# Supplementary material
Source: MDPI journal article supplement (https://www.mdpi.com/2073-4433/14/10/1549)
Supplement: s1 [file s1]

# Supplementary Information

## Insight into Municipal Reactive Nitrogen Emissions and Their Influencing Factors: A Case Study of Xiamen City, China

Yanmin Li <sup>1,\*</sup>, Xu Yang <sup>1</sup>, Shihang Wang <sup>1</sup> and Shenghui Cui <sup>2,3,4</sup>

<sup>1</sup> School of Spatial Informatics and Geomatics Engineering, Anhui University of Science and Technology, Huainan 232001, China; xyang@aust.edu.cn (X.Y.); wangshihang122@sina.com (S.W.)

<sup>2</sup> Key Lab of Urban Environment and Health, Institute of Urban Environment, Chinese Academy of Sciences, Xiamen 361021, China; shcui@iue.ac.cn

<sup>3</sup> Xiamen Key Lab of Urban Metabolism, Institute of Urban Environment, Chinese Academy of Sciences, Xiamen 361021, China

<sup>4</sup> University of Chinese Academy of Sciences, Beijing 101408, China

\* Correspondence: yanminli@aust.edu.cn

The purpose of this supplementary is to describe and explain each of the values and the calculating course (such as equation, parameter and activity data) use to calculate reactive nitrogen in Xiamen city. The reactive nitrogen refers to the nitrogen pollutants that have negative impacts on the atmosphere and water bodies produced during the nitrogen flow process, mainly including nitrogen pollutants that enter water bodies through runoff and infiltration, as well as NO<sub>x</sub>, NH<sub>3</sub> and N<sub>2</sub>O emission.

### Appendix A. Various subsystems of nitrogen flows

#### Cropland system

- Model of N flows in cropland system

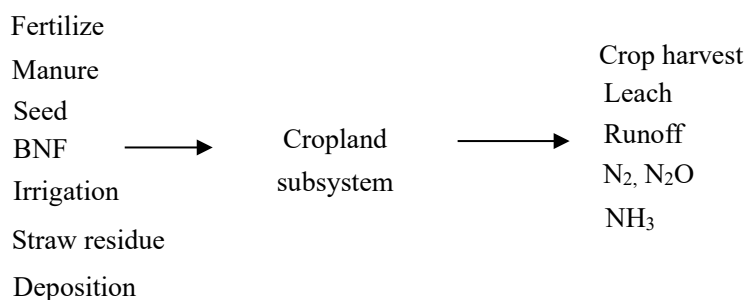

- Equation

According to the cropland system nitrogen flow model the input-output are shown above. This section describes in detail the calculation of each input item, coefficients and activity data. The equation of cropland system can be calculated using the following method:

$$C_{input} = C_{fertilizer} + C_{BNF} + C_{seed} + C_{deposition} + C_{manure} + C_{straw-residue} + C_{irrigation} \quad (1.1)$$

$$C_{output} = C_{harvest} + C_{N_2} + C_{N_2O} + C_{leach} + C_{runoff} + C_{ammonia-volatilization} \quad (1.2)$$

Where  $C_{input}$  and  $C_{output}$  are the total nitrogen input and output to cropland;  $C_{fertilizer}$  is synthetic fertilizer application;  $C_{BNF}$  is biological fixation of nitrogen, including leguminous plant nitrogen fixation and non-leguminous plant nitrogen fixation;  $C_{seed}$  is the seeds of different crops;  $C_{deposition}$  is nitrogen deposition;  $C_{manure}$  is manure recycled to cropland from both livestock and human;  $C_{straw-residue}$  is straw recycled to cropland;  $C_{irrigation}$  is nitrogen input to the cropland from irrigation;  $C_{harvest}$  is crop production;  $C_{N_2}$  is nitrogen loss by denitrification  $N_2$ ;  $C_{N_2O}$  is  $N_2O$  emission;  $C_{leach}$  is nitrogen leaking to groundwater;  $C_{runoff}$  is nitrogen loss through runoff;  $C_{ammonia-volatilization}$  is ammonia volatilization during fertilization.

**Table S1.** Input and output items in processes of cropland system.

| Items               | Equations                                      | Activity Data and Parameters Description                                                                                                            |
|---------------------|------------------------------------------------|-----------------------------------------------------------------------------------------------------------------------------------------------------|
| Chemical fertilizer | $C_{fertilizer} = F1 \times R1 + F2$           | F1: Consumption of compound fertilizer<br>F2: Consumption of nitrogenous fertilizer<br>R1: N content of compound fertilizer                         |
| BNF                 | $C_{BNF} = F4 \times R2 + (F3 - F4) \times R3$ | F3: Total sown area;<br>F4: Sown area of legume crops<br>R2: Symbiotic N-fixation rate of cropland<br>R3: Non-symbiotic N-fixation rate of cropland |
| Deposition          | $C_{deposition} = F5 \times R4$                | F5: Area of cropland<br>R4: N deposition rate                                                                                                       |
| Seed                | $C_{seed} = F6 \times R5 \times R6$            | F6: Sown area of different crops<br>R5: Seed rate<br>R6: N content of seed                                                                          |

---

|                                                       |                                                                                                                      |                                                                                                                                                                                                                                                                                                                                  |
|-------------------------------------------------------|----------------------------------------------------------------------------------------------------------------------|----------------------------------------------------------------------------------------------------------------------------------------------------------------------------------------------------------------------------------------------------------------------------------------------------------------------------------|
| Irrigation water                                      | $C_{irrigation} = F5 \times R7$                                                                                      | R7: Irrigation rate                                                                                                                                                                                                                                                                                                              |
|                                                       | $C_{animal\ manure} = F7 \times R8 \times R9 / 365 \times R10$                                                       | F7: Number of livestock and poultry<br>R8: N excreta rate for animals<br>R9: Feeding period of livestock and poultry<br>R10: Ratio of animal excreta back to field                                                                                                                                                               |
| Manure to field                                       | $C_{human\ manure} = F8 \times R11 \times R12$                                                                       | F8: Population (count)<br>R11: N excreta rate for humans<br>R12: Ratio of human excreta back to field                                                                                                                                                                                                                            |
| Crop residue                                          | $C_{crop\ residue} = F9 \times (1 / R13 - 1) \times R14 \times R15$                                                  | F9: Yield of grain crops<br>R13: Harvest Index of crops<br>R14: N content of straws<br>R15: Ratio of straw back to field                                                                                                                                                                                                         |
| Denitrification<br>(N <sub>2</sub> +N <sub>2</sub> O) | $C_{denitrification} = C_{surplus} \times R16$                                                                       | R16: Denitrification percentage (N <sub>2</sub> )<br>R17: Direct N <sub>2</sub> O emission factor from chemical fertilizer<br>R18: Direct N <sub>2</sub> O emission factor from organic fertilizer<br>R19: N <sub>2</sub> O-yield ratio of denitrification<br>R20: Leaching ratio of applied N<br>R21: Runoff ratio of applied N |
| N <sub>2</sub> O                                      | $C_{N_2O} = (C_{manure} + C_{crop\ residue}) \times R17 + C_{fertilizer} \times R18$<br>$+ C_{denitrification-N_2O}$ |                                                                                                                                                                                                                                                                                                                                  |
| Denitrification<br>(N <sub>2</sub> O)                 | $C_{denitrification-N_2O} = C_{denitrification} \times R19 / 1.039$                                                  |                                                                                                                                                                                                                                                                                                                                  |
| Ammonia-volatilization                                | $C_{ammonial-volatilization} = (C_{manure} + C_{crop\ residue}) \times R22$<br>$+ C_{fertilizer} \times R23$         | R22: Volatilization coefficient of organic fertilizer<br>R23: Volatilization coefficient of chemical fertilizer                                                                                                                                                                                                                  |
| Crop harvest                                          | $C_{crop\ harvest} = F9 / R13 \times R24$                                                                            | R24: N content of crop                                                                                                                                                                                                                                                                                                           |
| Runoff                                                | $C_{runoff} = C_{surplus} \times R20 \times R25$                                                                     | R25: the retention coefficient of N runoff                                                                                                                                                                                                                                                                                       |
| Leach                                                 | $C_{leach} = C_{input} \times R21$                                                                                   |                                                                                                                                                                                                                                                                                                                                  |
| Surplus                                               | $C_{surplus} = C_{input} - C_{ammonial-volatilization} - C_{crop-harvest}$                                           |                                                                                                                                                                                                                                                                                                                                  |

---

**Table S2.** The parameter of cropland system.

| <i>NO</i>  | <b>Item description</b>                                          | <b>Unit</b>       | <b>Reference</b> | <b>Value</b>                                                                                                    |
|------------|------------------------------------------------------------------|-------------------|------------------|-----------------------------------------------------------------------------------------------------------------|
| <i>R1</i>  | N content of compound fertilizer                                 | %                 | [63]             | 33.3                                                                                                            |
| <i>R2</i>  | Symbiotic N-fixation rate of cropland                            | kg/ha             | [64]             | Legumes:105; peanut:112                                                                                         |
| <i>R3</i>  | Non-symbiotic N-fixation rate of cropland                        | kg/ha             | [64]             | 18.75                                                                                                           |
| <i>R4</i>  | N deposition rate                                                | kg/ha             | [65]             | 30.15                                                                                                           |
| <i>R5</i>  | Seed rate                                                        | kg/ha             | [66]             | Rice:37.5; soybean:76.05;<br>potatoes:225; peanut:285;rapeseed:1;<br>sesame:5; vegetables:15.38                 |
| <i>R6</i>  | N content of seed                                                | %                 | [66]             | Cereal:1.3;potatoes:0.3;soybean:4.2;peanut:4.4;rapeseed:4;sesame:3.49;sugarcane:0.13;vegetables:0.2;furits:0.21 |
| <i>R7</i>  | Irrigation rate                                                  | kg/ha             | [67]             | 26.3                                                                                                            |
| <i>R8</i>  | N excreta rate for animals                                       | kg/cap            | [68]             | Pig:8; cattle:40; sheep:5; rabbit:0.4; poultry:0.3                                                              |
| <i>R9</i>  | Feeding period of livestock                                      | day               | [68]             | Pig:199;cattle:365;sheep:365; rabbit:120; poultry:55                                                            |
| <i>R10</i> | Ratio of animal excreta back to field                            | %                 | [68]             | Pig:60;cattle:77.7;sheep:70; rabbit:35; poultry:39                                                              |
| <i>R11</i> | N excreta rate for humans                                        | %                 | [68]             | 5                                                                                                               |
| <i>R12</i> | Ratio of human excreta back to field                             | %                 | [68]             | urban :10; rural :30                                                                                            |
| <i>R13</i> | Harvest Index of crops                                           |                   | [68]             | Cereal:0.53; potatoes:0.66; soybean:0.5; peanut:0.55; rapeseed:0.28; sesame:0.37; sugarcane:0.67;               |
| <i>R14</i> | N content of straws                                              | %                 | [68]             | Cereal:0.91; potatoes:2.51; soybean:2.1; peanut:1.82; rapeseed:0.87; sesame:1.31; sugarcane:1.1;                |
| <i>R15</i> | Ratio of straw back to field                                     | %                 | [68]             | Cereal:41.7; potatoes:50; soybean:16.8; peanut:26; rapeseed:47.6; sesame:0; sugarcane:10;                       |
| <i>R16</i> | Denitrification percentage (N <sub>2</sub> )                     | %                 | [69]             | 72.5                                                                                                            |
| <i>R17</i> | Direct N <sub>2</sub> O emission factor from chemical fertilizer | %                 | [70]             | 0.86                                                                                                            |
| <i>R18</i> | Direct N <sub>2</sub> O emission factor from organic fertilizer  |                   | [36]             | 0.01                                                                                                            |
| <i>R19</i> | N <sub>2</sub> O-yield ratio of denitrification                  | Kg/N <sub>2</sub> | [3]              | 0.039                                                                                                           |

|            |                                                   |   |      |                                                                                                                                    |
|------------|---------------------------------------------------|---|------|------------------------------------------------------------------------------------------------------------------------------------|
| <i>R20</i> | Leaching ratio of applied N                       | % | [40] | 12.5                                                                                                                               |
| <i>R21</i> | Runoff ratio of applied N                         | % | [69] | 16.7                                                                                                                               |
| <i>R22</i> | Volatilization coefficient of excreta             | % | [71] | Pig:19; cattle:17; sheep:25; rabbit:54;<br>poultry:22; human:25                                                                    |
| <i>R23</i> | Volatilization coefficient of chemical fertilizer | % | [72] | 20                                                                                                                                 |
| <i>R24</i> | N content of crop                                 | % | [73] | Cereal:1.12; potatoes:1.04; soybean:3.15;<br>peanut:3.25; rapeseed:1.75; sesame:2.12;<br>sugarcane:0.37;vegetables:0.3;furits:0.19 |
| <i>R25</i> | the retention coefficient of N runoff             | % | [74] | 42.5%                                                                                                                              |

**Table S3.** the activity data of cropland system.

| <i>No.</i> | <b>Item description</b>               | <b>Unit</b> | <b>Ref.</b> |
|------------|---------------------------------------|-------------|-------------|
| <i>F1</i>  | Consumption of nitrogenous fertilizer | T           |             |
| <i>F2</i>  | Consumption of compound fertilizer    | T           |             |
| <i>F3</i>  | Total sown area                       | ha          |             |
| <i>F4</i>  | Sown area of legume crops             | ha          | [75]        |
| <i>F5</i>  | Area of cropland                      | ha          |             |
| <i>F6</i>  | Sown area of different crops          | ha          |             |
| <i>F7</i>  | Number of livestock and poultry       |             |             |
| <i>F8</i>  | Population (count)                    |             |             |
| <i>F9</i>  | Yield of grain crops                  | T           |             |

## Human consumption system

- Model of N flow in human consumption system

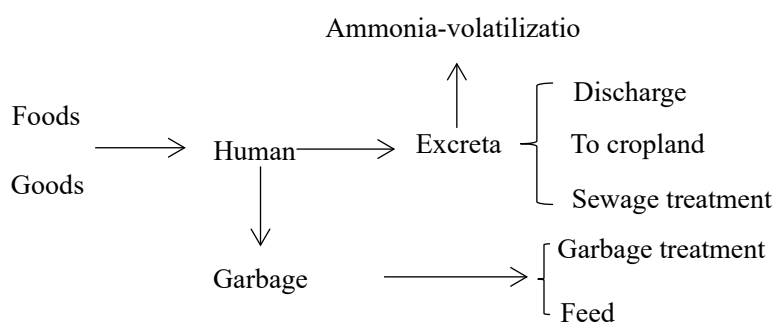

- Equation

According to the human consumption system nitrogen flow model the input-output are shown above. This section describes in detail the calculation of each input item, coefficients and activity data. The equation of household consumption system can be calculated using the following method:

$$H_{input} = H_{food-consumption} + H_{goods} \quad (2.1)$$

$$H_{output} = H_{excreta} + H_{ammonia-volatilization} + H_{garbage} \quad (2.2)$$

Where  $H_{input}$  and  $H_{output}$  are the total nitrogen input and output to household consumption system;  $H_{food-consumption}$  is human food consumption;  $H_{excreta}$  is human excretion which can be recycle to cropland, sent to WTPs and discharge to surface water;  $H_{ammonia-volatilization}$  is the ammonia emission from the human excreta;  $H_{garbage}$  is the garbage mainly including foods and goods waste.

**Table S4.** Input and output items in processes of human consumption system.

| Items                  | Equations                                                                                                        | Activity data and parameters description                                                                                                                                                                                                                                                                                    |
|------------------------|------------------------------------------------------------------------------------------------------------------|-----------------------------------------------------------------------------------------------------------------------------------------------------------------------------------------------------------------------------------------------------------------------------------------------------------------------------|
| Food consumption       | $H_{food-consumption} = F10 \times (1 + R26) \times R28 \times F12 + F11 \times (1 + R27) \times R28 \times F13$ | F10: Per capita consumption of foods in urban region<br>F11: Per capita consumption of foods in rural region<br>F12: the population of urban<br>F13: the population of rural<br>R26: the proportion of urban population dining outside<br>R27: the proportion of rural population dining outside<br>R28: N content of foods |
| Kitchen garbage        | $H_{kitchen-garbage} = H_{food-consumption} \times (R29 + R30)$                                                  | R29: Ratio of kitchen garbage in outside<br>R30: ratio of kitchen garbage in house                                                                                                                                                                                                                                          |
| Excreta                | $H_{excreta} = (H_{food-consumption} - H_{kitchen-garbage}) \times R31$                                          | R31: the proportion of excreta                                                                                                                                                                                                                                                                                              |
| Ammonia-volatilization | $H_{NH_4} = H_{excreta} \times R22$                                                                              |                                                                                                                                                                                                                                                                                                                             |

|                          |                                                              |                                                                                    |
|--------------------------|--------------------------------------------------------------|------------------------------------------------------------------------------------|
| To sewage                | $H_{sewage} = H_{excreta} \times R32$                        | R32: human excreta into the sewage treatment system                                |
| Discharge                | $H_{discharge} = H_{excreta} - H_{NH_4} - H_{sewage}$        |                                                                                    |
| Kitchen garbage to feeds | $H_{kitchen-garbage-feeds} = H_{kitchen-garbage} \times R15$ |                                                                                    |
| $G_{goods}$              | $G_{goods} = G_{input} - G_{foods}$                          | $G_{input}$ : municipal garbage (detail in table13)<br>$G_{goods}$ : goods garbage |
| Goods                    | $H_{goods} = G_{goods} \times R33$                           | R33: The percentage of goods that go to waste                                      |

**Table S5.** The parameter of human consumption system.

| NO. | Item description                                  | Unit | Reference | Value                                                                                                                                    |
|-----|---------------------------------------------------|------|-----------|------------------------------------------------------------------------------------------------------------------------------------------|
| R26 | the proportion of urban population dining outside | %    | [68,73]   | Cereal:41;potao:20;beans:41;vegeTable S:42; fruits:10;pork:42;beef:33;mutton:33;chicken:31; eggs:31; aquatic:31                          |
| R27 | the proportion of rural population dining outside | %    | [68,73]   | Cereal:10;potao:10;beans:10;vegeTable S:13; fruits:12;pork:20;beef:25;mutton:25;chicken:13; eggs:5; aquatic:19                           |
| R28 | N content of foods                                | %    | [74]      | Cereal:1.36;pork:2.1;beef:2.97;mutton:3.04; Chicken:3.1;duck:2.5;eggs:2.1;fish:2.32;shrimp: 2.32<br>VegTable S:0.32;fruits:0.18;milk:0.5 |
| R29 | Ratio of kitchen garbage in outside               | %    | [76]      | Cereal:5;fruits:5;vegeTable S:5;pork:10;beef:10; Mutton:10;chicken:10;duck:10;eggs:10;shrimp: 10<br>Milk:10                              |
| R30 | ratio of kitchen garbage in house                 | %    | [76]      | Cereal:18;fruits:20;vegeTable S:20;pork:21;beef:21; Mutton:21;chicken:21;duck:21;eggs:24;shrimp: 24<br>Milk:22                           |
| R31 | the proportion of excreta                         | %    | [15]      | 88                                                                                                                                       |
| R32 | human excreta into the sewage treatment system    | %    | [68]      | Urban:75; rural:7.2                                                                                                                      |

|            |                                          |  |      |      |
|------------|------------------------------------------|--|------|------|
| <b>R33</b> | The percentage of goods that go to waste |  | [77] | 1/15 |
|------------|------------------------------------------|--|------|------|

**Table S6.** The activity data of human consumption system.

| No.        | Item description                                | Unit | Ref  |
|------------|-------------------------------------------------|------|------|
| <b>F10</b> | Per capita consumption of foods in urban region | T    |      |
| <b>F11</b> | Per capita consumption of foods in rural region | T    | [75] |
| <b>F12</b> | the population of urban                         |      |      |
| <b>F13</b> | the population of rural                         |      |      |

## Livestock system

- Model of N flow in livestock system

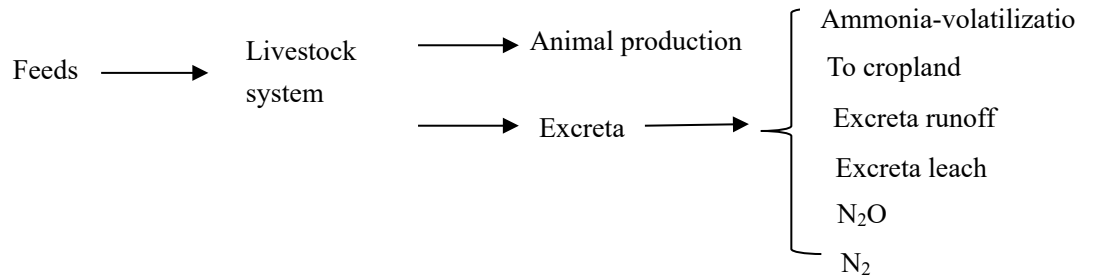

- Equation

According to the livestock system nitrogen flow model the input-output are shown above. This section describes in detail the calculation of each input item, coefficients and activity data. The equation of livestock system can be calculated using the following method:

$$L_{input} = L_{straw-feeds} + L_{seed-feeds} + L_{import-feeds} + L_{kitchen-garbage-feeds} \quad (3.1)$$

$$L_{output} = L_{animal-production} + L_{excreta} \quad (3.2)$$

Where  $H_{input}$  and  $H_{output}$  are the total nitrogen input and output to livestock system;

$L_{straw-feeds}$  is straw used as livestock feed;  $L_{seed-feeds}$  is seed used as livestock feed;

$L_{kitchen-garbage-feeds}$  is cooking wastes used as livestock feed;  $L_{import-feeds}$  is feeds from

the out system;  $L_{animal-production}$  is the production of animal foods ;  $L_{excreta}$  is livestock



excretion.

**Table S7.** Input and output items in processes of livestock system.

| Items                             | Equations                                                                                                                                                            | Activity data and parameters description                                  |
|-----------------------------------|----------------------------------------------------------------------------------------------------------------------------------------------------------------------|---------------------------------------------------------------------------|
| Straw feeds                       | $L_{\text{straw-feed}} = C_{\text{crop residue}}$                                                                                                                    | Table 1                                                                   |
| Seed feeds                        | $L_{\text{seed-feed}} = F9 \times (1 / R13 - 1) / R34 \times R35$                                                                                                    | R34: the ratio of straw to grain<br>R35: The N content of grain           |
| Garbage feeds                     | $L_{\text{garbage-feed}} = H_{\text{kitchen-garbage-feeds}}$                                                                                                         | Human system (table3)                                                     |
| Animal excreta                    | $L_{\text{animal-excreta}} = C_{\text{animal-manure}}$                                                                                                               | Human system (table3)                                                     |
| Animal production                 | $L_{\text{animal-production}} = F14 \times R36$                                                                                                                      | F14: the production of animal foods<br>R36: The N content of animal foods |
| Denitrification (N <sub>2</sub> ) | $L_{\text{denitrification}} = L_{\text{animal-excreta}} \times R37$                                                                                                  | R37: N <sub>2</sub> emission from nitrification process                   |
| N <sub>2</sub> O                  | $L_{\text{denitrification}} = L_{\text{animal-excreta}} \times R38$                                                                                                  | R38: the ratio of N <sub>2</sub> O emission                               |
| Ammonia volatilization            | $L_{\text{ammonia-volatilization}} = L_{\text{ammonia-volatilization}}$                                                                                              | Cropland system (table2)                                                  |
| Excreta runoff                    | $L_{\text{excreta-runoff}} = (L_{\text{excreta}} - L_{\text{ammonia-volatilization}} - L_{\text{to-cropland}} - L_{\text{N}_2\text{O}} - L_{\text{N}_2}) \times R39$ | R39: the ratio of runoff                                                  |
| leach                             | $L_{\text{excreta-runoff}} = (L_{\text{excreta}} - L_{\text{ammonia-volatilization}} - L_{\text{to-cropland}} - L_{\text{N}_2\text{O}} - L_{\text{N}_2}) \times R40$ | R40: the ratio of leach                                                   |

**Table S8.** The parameters of livestock system.

| NO. | Item description                                   | Unit | Reference | Value                                                                                    |
|-----|----------------------------------------------------|------|-----------|------------------------------------------------------------------------------------------|
| R34 | the ratio of straw to grain                        |      | [68]      | Cereal:0.9;potao:0.66;beans:0.5;peanut:0.55;<br>Rapeseed:0.28;sesame:0.37;sugarcane:0.67 |
| R35 | The N content of grain                             | %    | [68]      | Cereal:1.3;potao:0.3;beans:4.2;peanut:4.4;<br>Rapeseed:4;sesame:3.49;sugarcane:0.13      |
| R36 | The N content of animal foods                      | %    | [74]      | Pork:1.77; beef:2.19;mutton:2.22;poultry:1.90<br>Rabbit meat:3.4;dairy:0.55;eggs:1.83    |
| R37 | N <sub>2</sub> emission from nitrification process | %    | [77]      | 5                                                                                        |

|            |                                                      |   |         |     |
|------------|------------------------------------------------------|---|---------|-----|
| <b>R38</b> | N <sub>2</sub> O emission from nitrification process | % |         | 0.5 |
| <b>R39</b> | the ratio of runoff                                  | % | [59,62] | 60% |
| <b>R40</b> | the ratio of leach                                   | % | [59,62] | 5%  |

**Table S9.** The activity data of livestock system.

| No.        | Item description               | Unit | Ref  |
|------------|--------------------------------|------|------|
| <b>F14</b> | the production of animal foods | T    | [75] |

## Sewage treatment

- Model of N flow in sewage treatment system

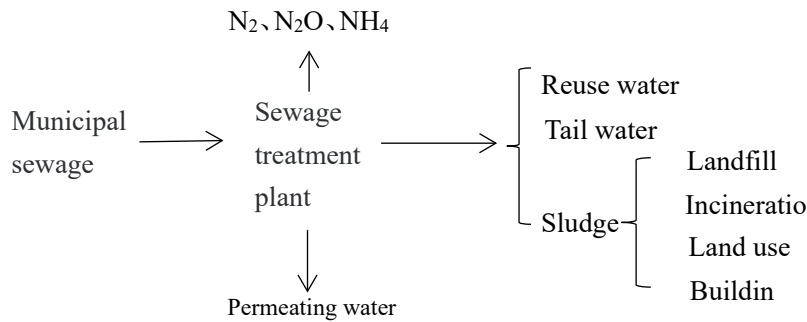

- Equation

According to the sewage treatment system nitrogen flow model the input-output are shown above. This section describes in detail the calculation of each input item, coefficients and activity data. The equation of sewage treatment system can be calculated using the following method:

$$S_{input} = S_{municipal-sewage} \quad (4.1)$$

$$S_{output} = S_{sludge} + S_{tail-water} + S_{reuse-water} + S_{gaseous(N_2, N_2O, NH_3)} + S_{permeat} \quad (4.2)$$

Where  $S_{input}$  and  $S_{output}$  are the total nitrogen input and output to sewage treatment system;  $S_{municipal-sewage}$  is municipal waste water including domestic wastewater, industry wastewater and others;  $S_{sludge}$  is sludge from WTPs;  $S_{reuse-water}$  is recycled

water after treated;  $S_{gaseous}$  is gaseous emission in treatment process including  $N_2$ ,  $NH_3$  and  $N_2O$ ;  $S_{permeate}$  is nitrogen leaching during the wastewater transferred to the WTPs;  $S_{tail-water}$  is discharged after sewage treated;

**Table S10.** Input and output items in processes of sewage treatment system.

| Items                    | Equations                                                                        | Activity data and parameters description                                                                   |
|--------------------------|----------------------------------------------------------------------------------|------------------------------------------------------------------------------------------------------------|
| Sewage input             | $S_{input} = F15 \times R41$                                                     | F15: the input of sewage treatment<br>R41: N input per ton of water                                        |
| Sludge                   | $S_{sludge} = F15 \times R42 \times (1 - R43) \times R44$                        | R42: The ration of sludge generation<br>R43: percent of sludge contained water<br>R44: N content of sludge |
| Permeate                 | $S_{permeate} = S_{input} \times R45$                                            | R45: The permeability of pipe                                                                              |
| Reuse water              | $S_{reuse-water} = S_{input} \times R46$                                         | R46: Recycling rate of water                                                                               |
| Ammonia-emission         | $S_{ammonia-emission} = F16 \times R47$                                          | F16: The volume of input sewage<br>R47: ammonia emission per cubic meter of sewage                         |
| $N_2O$ emission          | $S_{N_2O} = S_{input} \times R48$                                                | R48: the ration of $N_2O$ emission                                                                         |
| Denitrification( $N_2$ ) | $S_{N_2} = S_{input} \times R49 - S_{N_2O}$                                      | R49: the removal ration of nitrogen                                                                        |
| Tail water               | $S_{tail-water} = S_{input} - S_{sludge} - S_{reuse-water} - S_{N_2O} - S_{N_2}$ |                                                                                                            |

**Table S11.** The parameters of sewage treatment system.

| NO.        | Item description                  | Unit | Reference    | Value  |
|------------|-----------------------------------|------|--------------|--------|
| <b>R41</b> | N input per ton of water          | Kg/t | [62]         | 0.0468 |
| <b>R42</b> | The ration of sludge generation   | %    | Field survey | 0.05   |
| <b>R43</b> | percent of sludge contained water | %    | Field survey | 80     |
| <b>R44</b> | N content of sludge               | %    | Field survey | 2.9    |

|            |                                            |                  |              |       |
|------------|--------------------------------------------|------------------|--------------|-------|
| <b>R45</b> | The permeability of pipe                   | %                | [15]         | 9     |
| <b>R46</b> | Recycling rate of water                    | %                | Field survey | 10    |
| <b>R47</b> | ammonia emission per cubic meter of sewage | g/m <sup>3</sup> | [78]         | 3.2   |
| <b>R48</b> | the ration of N <sub>2</sub> O emission    | %                | [36]         | 1.25  |
| <b>R49</b> | the removal ration of nitrogen             | %                | Field survey | 60.42 |

**Table S12.** The activity data of sewage treatment system.

| <b>No.</b> | <b>Item description</b>       | <b>Unit</b>    | <b>Ref</b> |
|------------|-------------------------------|----------------|------------|
| <b>F15</b> | the input of sewage treatment | T              | [62]       |
| <b>F16</b> | The volume of input sewage    | M <sup>3</sup> | [62]       |

## Garbage treatment system

- Model of N flow in garbage treatment system

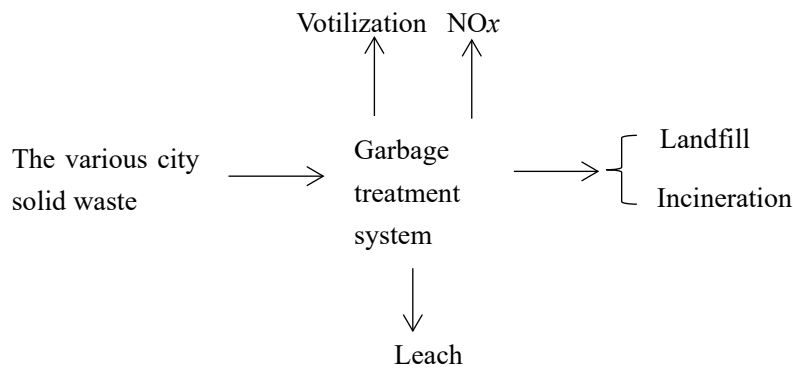

- Equation

According to the garbage treatment system nitrogen flow model the input-output are shown above. This section describes in detail the calculation of each input item, coefficients and activity data. The equation of garbage treatment system can be calculated using the following method:

$$G_{input} = G_{city-solid-waste} \quad (5.1)$$

$$G_{output} = G_{leach} + G_{volatilization} + G_{NO_x} \quad (5.2)$$

Where  $G_{input}$  and  $G_{output}$  are the total nitrogen input and output to garbage treatment

system;  $G_{city-solid-waste}$  are municipal solid wastes including household waste, medical

waste, industrial waste, garden waste and so on. and others;  $G_{leach}$  is the nitrogen contained in garbage released to the groundwater during the landfill process;  $G_{volatilization}$  is generated during process of incineration;  $G_{NO_x}$  is emission from the process of incineration;

**Table S13.** Input and output items in processes of garbage treatment system.

| Items          | Equations                                                | Activity data and parameters description                                                                                                            |
|----------------|----------------------------------------------------------|-----------------------------------------------------------------------------------------------------------------------------------------------------|
| Garbage input  | $G_{input} = (1 - R50) \times F17 \times R51 \times R52$ | R50: the rate of garbage disposal<br>F17: the amount of garbage<br>R51: the percentage of various types of garbage<br>R52: the N content of garbage |
| Landfill       | $G_{landfill} = G_{input} \times R53$                    | R53: the ratio of landfill                                                                                                                          |
| Incineration   | $G_{landfill} = G_{input} \times R54$                    | R54: the ratio of incineration                                                                                                                      |
| leach          | $G_{leach} = G_{landfill} \times R55$                    | R55: the ratio of leach                                                                                                                             |
| NOx            | $G_{NO_x} = G_{incineration} \times R56$                 | R56: the factor of NOx emission                                                                                                                     |
| Volatilization | $G_{volatilization} = G_{landfill} \times R57$           | R57: the factor of volatilization                                                                                                                   |

**Table S14.** The parameters of garbage treatment system.

| NO.        | Item description                           | Unit | Reference    | Value                                                                                             |
|------------|--------------------------------------------|------|--------------|---------------------------------------------------------------------------------------------------|
| <b>R50</b> | the rate of garbage disposal               | %    | Field survey | 96.92                                                                                             |
| <b>R51</b> | the percentage of various types of garbage | %    | [79]         | Food-waste:51.5;papers:9.3; plastics:15;textile:5.1<br>Woods:2;glasses:2.9; metals:0.7;dust:13.5  |
| <b>R52</b> | the N content of garbage                   | %    | [79]         | Food-waste:2.6;papers:0.3; plastics:0.5;textile:10<br>Woods:0.3;glasses:0.1; metals:0.1;dust:0.98 |

|            |                              |      |              |      |
|------------|------------------------------|------|--------------|------|
| <b>R53</b> | the ratio of landfill        | %    | Field survey | 56.8 |
| <b>R54</b> | the ratio of incineration    | %    | Field survey | 43.2 |
| <b>R55</b> | the ratio of leach           | %    | [19]         | 1/6  |
| <b>R56</b> | the factor of NOx emission   | g/kg | [77]         | 67   |
| <b>R57</b> | the factor of volatilization | g/kg | [77]         | 0.6  |

**Table S15.** The activity data of garbage treatment system.

| <b>No.</b> | <b>Item description</b> | <b>Unit</b> | <b>Ref</b> |
|------------|-------------------------|-------------|------------|
| <b>F17</b> | the amount of garbage   | T           | [75]       |

## Aquaculture system

- Model of N flow in aquaculture system

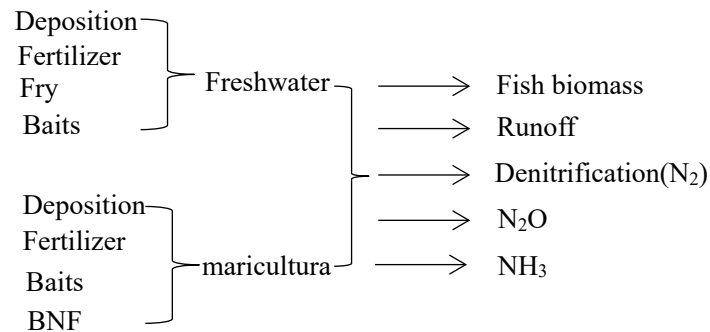

- Equation

According to the aquaculture system nitrogen flow model the input-output are shown above. We divided it into freshwater aquaculture and mariculturist. This section describes in detail the calculation of each input item, coefficients and activity data. The equation of aquaculture system can be calculated using the following method:

$$A_{input} = A_{freshwater} + A_{mariculture} \quad (6.1)$$

$$A_{output} = A_{fish-biomass} + A_{runoff} + A_{N_2O} + A_{denitrification} + A_{NH_3} \quad (6.2)$$

Where  $A_{input}$  and  $A_{output}$  are the total nitrogen input and output to aquaculture system;

$A_{freshwater}$  is freshwater aquaculture;  $A_{mariculture}$  is the mariculture;  $A_{fish-biomass}$  is aquaculture production;  $A_{runoff}$  is water runoff;  $A_{denitrification}$  is N<sub>2</sub> denitrification during aquaculture production;  $A_{N_2O}$  is N<sub>2</sub>O emission from aquaculture production;  $A_{NH_3}$  is NH<sub>3</sub> volatilization.

**Table S16.** Input and output items in processes of aquaculture system.

| Items                    | Equations                                                                | Activity data and parameters description                                                                                                                           |
|--------------------------|--------------------------------------------------------------------------|--------------------------------------------------------------------------------------------------------------------------------------------------------------------|
| Fertilizer (freshwater)  | $A_{fertilizer-1} = F18 \times R58 \times R59$                           | F18: the area of freshwater aquaculture<br>R58: the amount of compound fertilizer per unit area of freshwater aquaculture<br>R59: N content of compound fertilizer |
| Fertilizer (mariculture) | $A_{fertilizer-2} = A_{baits} \times R60$                                | R60: the percentage of compound fertilizer and baits in mariculture                                                                                                |
| Bait                     | $A_{bait} = F19 \times R61 \times R62$                                   | F19: the production of aquaculture<br>R61: the ratio of feed in aquaculture<br>R62: The N content of bait in aquaculture                                           |
| Fry                      | $A_{fry} = F20 \times R63$                                               | F20: the amount of fry per unit area<br>R63: the N content of various fry                                                                                          |
| Deposition               | $A_{deposition-1} = F18 \times R4$<br>$A_{deposition-2} = F21 \times R4$ | F21: the area of freshwater maricultuer                                                                                                                            |
| BNF                      | $A_{BNF} = F22 \times R64$                                               | F22: The amounts of algae<br>R64: The N content of algae                                                                                                           |
| Fish biomass             | $A_{fish-biomass} = F19 \times R65$                                      | R65: The N content of aquaculture                                                                                                                                  |
| Runoff                   | $A_{runoff} = A_{loss} \times R66$                                       | R66: the factor of runoff                                                                                                                                          |
| Denitrification          | $A_{denitrification} = A_{loss} \times R67$                              | R67: the factor of denitrification                                                                                                                                 |
| Ammonia-volatilization   | $A_{NH_3} = A_{loss} \times R68$                                         | R68: the factor of ammonia volatilization                                                                                                                          |

N<sub>2</sub>O

$$A_{N_2O} = A_{loss} \times R69$$

R69: the factor of N<sub>2</sub>O**Table S17.** The parameter of aquaculture system.

| NO. | Item description                                                          | Unit                | Reference | Value                                    |
|-----|---------------------------------------------------------------------------|---------------------|-----------|------------------------------------------|
| R58 | the amount of compound fertilizer per unit area of freshwater aquaculture | kg.hm <sup>-2</sup> | [62]      | 225.52                                   |
| R59 | N content of compound fertilizer                                          | %                   | [63]      | 33.3                                     |
| R60 | the percentage of compound fertilizer and baits in mariculture            | %                   | [80];[81] | 20                                       |
| R61 | the ratio of bait in aquaculture                                          | %                   | [7]       | Fish:2; shrimp:1.5;crab:2                |
| R62 | The N content of bait in aquaculture                                      | %                   | [81]      | Fish:6.4; shrimp:4.96;crab:5.76          |
| R63 | the N content of various fry                                              | %                   | [62]      | Fish:2.45; shrimp:2.43;crab:2.22         |
| R64 | The N content of algae                                                    | %                   | [7]       | 2.7                                      |
| R65 | The N content of aquaculture                                              | %                   | [7]       | Fish:3;shrimp:2.9;crab:2.9;shellfish:2.1 |
| R66 | the factor of runoff                                                      | %                   | [81]      | 10                                       |
| R67 | the factor of denitrification                                             | %                   | [77]      | 50                                       |
| R68 | the factor of ammonia volatilization                                      | %                   | [77]      | 15                                       |
| R69 | the factor of N <sub>2</sub> O                                            | %                   | [81]      | 1.25                                     |

**Table S18.** The activity data of aquaculture system.

| No. | Item description                    | Unit               | Ref  |
|-----|-------------------------------------|--------------------|------|
| F18 | the area of freshwater aquaculture  | Hm <sup>2</sup>    | [75] |
| F19 | the production of aquaculture       | T                  | [75] |
| F20 | the amount of fry per unit area     | Kg/hm <sub>2</sub> | [75] |
| F21 | the area of freshwater maricultural | Hm <sup>2</sup>    | [75] |



## Greenbelt system

- Model of N flow in greenbelt system

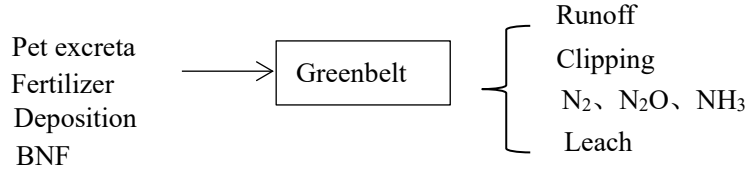

- Equation

According to the green space system nitrogen flow model the input-output is shown above. We divided it into the city lawn and city forest. This section describes in detail the calculation of each input item, coefficients and activity data. The equation of green space system can be calculated using the following method:

$$GR_{input-greenbelt} = GR_{deposition} + GR_{fertilizer} + GR_{BNF} + GR_{pet} \quad (7.1)$$

$$GR_{output-greenbelt} = GR_{clip} + GR_{runoff} + GR_{N_2O} + GR_{N_2} + GR_{NH_3} + GR_{leach} \quad (7.2)$$

Where  $GR_{input-greenbelt}$  are the total nitrogen inputs of greenbelt;  $GR_{output-greenbelt}$  are the total nitrogen outputs of greenbelt;  $GR_{deposition}$  is nitrogen deposition of greenbelt;  $GR_{fertilizer}$  is fertilizer applied to greenbelt;  $GR_{BNF}$  is biological nitrogen fixation in greenbelt ;  $GR_{pet}$  is pet excretion recycled to greenbelt;  $GR_{clip}$  is nitrogen output through grassland clipping;  $GR_{runoff}$  is water runoff from greenbelt;  $GR_{N_2O}$  is  $N_2O$  emission from greenbelt;  $GR_{N_2}$  is  $N_2$  denitrification during nitrogen loss process in greenbelt;  $GR_{leach}$  is the nitrogen leaching through greenbelt;  $GR_{NH_3}$  is  $NH_3$  volatilization from greenbelt;

**Table S19.** Input and output items in processes of green space system.

| Items | Equations                   | Activity data and parameters description                           |
|-------|-----------------------------|--------------------------------------------------------------------|
| BNF   | $GR_{BNF} = F22 \times R70$ | F22: Area of greenbelt<br>R70: Nitrogen fixation rate of greenbelt |

|                  |                                                                  |                                                                                                                                         |
|------------------|------------------------------------------------------------------|-----------------------------------------------------------------------------------------------------------------------------------------|
| Fertilizer       | $GR_{fertilizer} = F22 \times R71$                               | R71: fertilizer rate of greenbelt                                                                                                       |
| Pet-excreta      |                                                                  | Table25 in Pet system                                                                                                                   |
| Deposition       | $GR_{deposition-lawn} = F22 \times R4$                           |                                                                                                                                         |
| Runoff           | $GR_{runoff} = GR_{fertilizer} \times R72 + GR_{pet} \times R73$ | R72: Rate of fertilizer nitrogen runoff<br>R73: Rate of manure nitrogen runoff<br>R74: Factor of N <sub>2</sub> O emission in greenbelt |
| N <sub>2</sub> O | $GR_{N_2O} = GR_{fertilizer} \times R74$                         | R75: Factor of NH <sub>3</sub> emission from fertilizer                                                                                 |
| NH <sub>3</sub>  | $GR_{NH_3} = GR_{fertilizer} \times R75 + GR_{pet} \times R76$   | R76: Factor of NH <sub>3</sub> emission from manure                                                                                     |
| Leach            | $GR_{leach} = GR_{input} \times R77$                             | R77: Factor of leaching from greenbelt                                                                                                  |

**Table S20.** The parameter of green space system.

| NO.        | Item description                                   | Unit                 | Reference | Value |
|------------|----------------------------------------------------|----------------------|-----------|-------|
| <b>R70</b> | Nitrogen fixation rate of lawn                     | kg. ha <sup>-2</sup> | [16]      | 18    |
| <b>R71</b> | fertilizer rate of urban lawn                      | kg. ha <sup>-2</sup> | [82]      | 300   |
| <b>R72</b> | Rate of fertilizer nitrogen runoff                 | %                    | [19]      | 11    |
| <b>R73</b> | Rate of manure nitrogen runoff                     | %                    | [19]      | 5     |
| <b>R74</b> | Factor of N <sub>2</sub> O emission in greenbelt   | %                    | [19]      | 1.1   |
| <b>R75</b> | Factor of NH <sub>3</sub> emission from fertilizer | %                    | [19]      | 11    |
| <b>R76</b> | Factor of NH <sub>3</sub> emission from manure     | %                    | [19]      | 23    |
| <b>R77</b> | Factor of leaching from lawn                       | %                    | [77]      | 3.2   |

**Table S21.** The activity data of green space system.

| No. | Item description   | Unit            | Ref  |
|-----|--------------------|-----------------|------|
| F22 | Area of urban lawn | Ha <sup>2</sup> | [75] |
| F23 | Forest volume      | M <sup>3</sup>  | [75] |
| F24 | Area of forest     | Ha <sup>2</sup> | [75] |

## Energy system

- Model of N flow in energy system

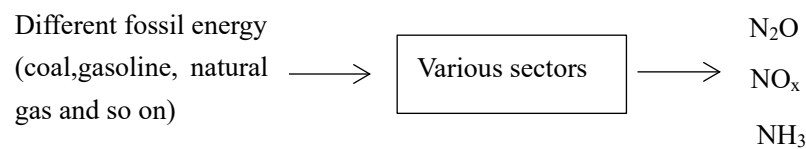

- Equation

According to the energy system nitrogen flow model the input-output are shown above. We based on mass balance the input is estimated according to the output. This section describes in detail the calculation of each input item, coefficients and activity data. The equation of energy system can be calculated using the following method:

$$E_{input} = E_{output} \quad (8.1)$$

$$E_{output} = E_{N_2O} + E_{NO_x} + E_{NH_3} \quad (8.2)$$

where  $E_{input}$  and  $E_{output}$  are the total nitrogen input and output to energy system;

$E_{N_2O}$  is the N<sub>2</sub>O emission from fossil fuel combustion;  $E_{NO_x}$  is the NO<sub>x</sub> emission from fossil fuel combustion;  $E_{NH_3}$  is the NH<sub>3</sub> emission.

**Table S22.** Input and output items in processes of green space system.

| Items            | Equations                                    | Activity data and parameters description                                                                                                        |
|------------------|----------------------------------------------|-------------------------------------------------------------------------------------------------------------------------------------------------|
| NO <sub>x</sub>  | $E_{NO_x} = (1 - R78) \times F26 \times R79$ | F26: Energy consumption of various sector<br>R78: Removal rate of NO <sub>x</sub> -<br>R79: Factor of energy sector NO <sub>x</sub> -N emission |
| N <sub>2</sub> O | $E_{N_2O} = F26 \times R80 \times R81$       | R80: Factor of energy sector N <sub>2</sub> O emission<br>R81: Conversion of fuel calorific value                                               |

|                 |                             |                                                                                                 |
|-----------------|-----------------------------|-------------------------------------------------------------------------------------------------|
| NH <sub>3</sub> | $E_{NH_3} = F27 \times R82$ | F27: vehicle-miles of travel<br>R82: Factor of vehicle-miles of travel NH <sub>3</sub> emission |
|-----------------|-----------------------------|-------------------------------------------------------------------------------------------------|

**Table S23.** The parameter of energy system.

| NO.        | Item description                                           | Unit                        | Reference | Value       |
|------------|------------------------------------------------------------|-----------------------------|-----------|-------------|
| <b>R78</b> | Removal rate of NO <sub>x</sub>                            | %                           | [82]      | 30          |
| <b>R79</b> | Factor of energy sector NO <sub>x</sub> -N emission        | Kg/t                        | [50]      | Table S23-a |
| <b>R80</b> | Factor of energy sector N <sub>2</sub> O emission          | kg/TJ                       | [50]      | Table S23-b |
| <b>R81</b> | Conversion of fuel calorific value                         | kJ/kg;<br>kJ/m <sup>3</sup> | [50]      | Table S23-c |
| <b>R82</b> | Factor of vehicle-miles of travel NH <sub>3</sub> emission | g/km                        | [50]      | Table S23-d |

**Table S24.** The activity data of energy system.

| No.        | Item description                     | Unit | Ref  |
|------------|--------------------------------------|------|------|
| <b>F25</b> | Energy consumption of various sector |      | [75] |

**Table S23-a.** Factor of energy sector NO<sub>x</sub> emission(kg/t).

| Sector         | Emission source | Coal | Coke | Crude oil | Gasoline | Kerosene | Diesel | Fuel oil | Natural gas |
|----------------|-----------------|------|------|-----------|----------|----------|--------|----------|-------------|
| Energy         | Electric        | 9.95 |      | 7.24      | 16.7     | 21.2     | 7.4    | 10.06    | 41          |
|                | Manufacture     | 0.75 | 0.9  | 2.19      |          |          | 9.62   | 5.84     |             |
|                | Oil refining    | 0.37 |      | 0.24      |          |          |        |          |             |
| Construction   |                 | 7.5  | 9    |           | 16.7     | 7.46     | 9.62   | 5.84     | 20.9        |
| Transportation | Highway         |      |      |           | 21.2     | 27.4     | 27.4   | 27.4     |             |
|                | Railway         | 7.5  | 9    |           |          |          | 54.1   | 54.1     |             |
|                | others          | 7.5  | 9    | 5.09      | 16.7     | 27.4     | 36.3   | 36.3     | 20.9        |
| Consumption    |                 | 1.88 | 2.25 | 1.7       | 16.7     | 2.49     | 3.21   | 1.95     | 14.6        |
| Commerce       |                 | 3.75 | 4.5  | 3.05      | 16.7     | 4.48     | 5.77   | 3.5      | 14.6        |
| Agriculture    |                 | 3    |      |           | 6.7      |          | 9.4    |          |             |
| others         |                 | 3.75 | 4.5  | 3.05      | 16.7     | 4.48     | 5.77   | 3.5      | 14.6        |

**Table S23-b.** Factor of energy sector N<sub>2</sub>O emission (kg/TJ).

| Sector         | Coal | Coke | Crude oil | Gasoline | Kerosene | Diesels | Natural gas |
|----------------|------|------|-----------|----------|----------|---------|-------------|
| Consumption    | 1.5  | 1.5  | 0.6       | 0.6      | 0.6      | 0.6     | 0.1         |
| Transportation |      |      |           | 3.2      | 2        | 3.9     | 0.1         |
| Agriculture    | 1.5  | 1.5  | 0.6       | 0.6      | 0.6      | 0.6     | 0.1         |
| Construction   | 1.5  | 1.5  | 0.6       | 0.6      | 0.6      | 0.6     | 0.1         |
| Commerce       | 1.5  | 1.5  | 0.6       | 0.6      | 0.6      | 0.6     | 0.1         |

**Table S23-c.** Conversion of fuel calorific value (kJ/kg; kJ/m<sup>3</sup>).

| Item        | Lower calorific value |
|-------------|-----------------------|
| Coal        | 20908                 |
| Coke        | 28435                 |
| Coal gas    | 16726                 |
| Crude oil   | 41816                 |
| Gasoline    | 43070                 |
| Kerosene    | 43070                 |
| Diesel      | 42652                 |
| Fuel oil    | 41816                 |
| Natural gas | 38931                 |

**Table S23-d.** Factor of vehicle-miles of travel NH<sub>3</sub> emission.

|                       | Factor of NH <sub>3</sub> emission g/km |
|-----------------------|-----------------------------------------|
| Heavy-duty car        | 0.028                                   |
| light car             | 0.026                                   |
| Heavy-duty diesel car | 0.017                                   |
| Light diesel car      | 0.017                                   |

## Pet system

- Model of N flow in pet system

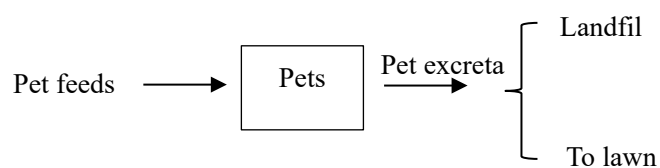

- Equation

According to the pet system nitrogen flow model the input-output are shown above. This section describes in detail the calculation of each input item, coefficients and activity data. The equation of pet system can be calculated using the following method:

$$P_{input} = P_{feeds} \quad (9.1)$$

$$P_{output} = P_{landfill} + P_{lawn} \quad (9.2)$$

Where  $P_{input}$  and  $P_{output}$  are the total nitrogen input and output to pet system;  $P_{feeds}$  is pet feed input including dog and cat feed;  $P_{landfill}$  is pet excretion which is sent to landfill;  $P_{lawn}$  is pet excretion which is recycled to urban lawn.

**Table S25.** Input and output items in processes of pet.

| Items     | Equations                                                                           | Activity data and parameters description                                                                                                                                                                                                   |
|-----------|-------------------------------------------------------------------------------------|--------------------------------------------------------------------------------------------------------------------------------------------------------------------------------------------------------------------------------------------|
| Feeds     | $P_{feeds} = F12/13 \times (R83 \times R84 \times R85 + R86 \times R87 \times R88)$ | R83: The proportion of the dog<br>R84: The weight of dog<br>R85: The per kilogram of dog needs nitrogen for per day<br>R86: The proportion of the cat<br>R87: The weight of cat<br>R88: The per kilogram of dog needs nitrogen for per day |
| Landfill  | $P_{landfill} = P_{excretion-cat} / 2$                                              | $P_{excretion-cat}$ : the excretion of cat                                                                                                                                                                                                 |
| Greenbelt | $P_{greenbelt} = P_{excretion-cat} / 2 + P_{excretion-dog}$                         | $P_{excretion-dog}$ : the excretion of dog                                                                                                                                                                                                 |

**Table S26.** The parameter of pet system.

| NO. | Item description          | Unit | Reference | Value |
|-----|---------------------------|------|-----------|-------|
| R83 | The proportion of the dog | %    | [62]      | 69.2  |
| R84 | The weight of dog         | kg   | [16]      | 20    |

|     |                                                    |      |      |      |
|-----|----------------------------------------------------|------|------|------|
| R85 | The per kilogram of dog needs nitrogen for per day | g/kg | [16] | 0.56 |
| R86 | The proportion of the cat                          | %    | [62] | 30.8 |
| R87 | The weight of cat                                  | kg   | [16] | 3.6  |
| R88 | The per kilogram of dog needs nitrogen for per day | g/kg | [16] | 0.88 |

## Industry system

- Model of N flow in industry system

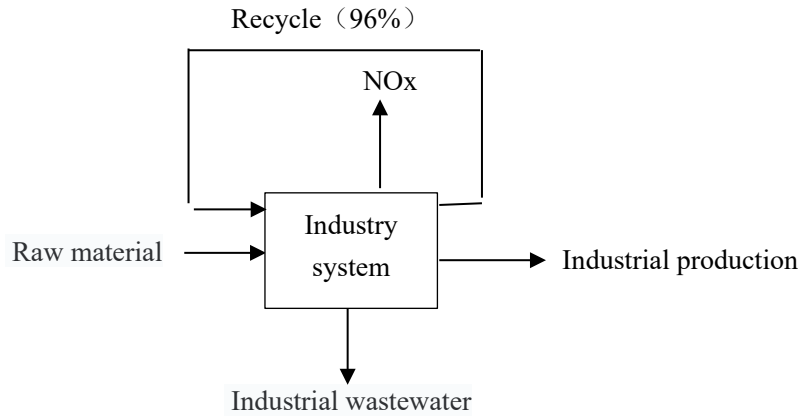

- Equation

According to the industry system nitrogen flow model the input-output are shown above. Ammonia synthesis industry and nitrogen fertilizer production is less in Xiamen, so we ignore the ammonia emission. Due to the lack of data, we only calculate NO<sub>x</sub> emission and waste water. These data come from local government statistical documents. The equation of industry system can be calculated using the following method:

$$I_{input} = I_{material} \quad (10.1)$$

$$I_{output} = I_{production} + I_{waste-water} + I_{NO_x} \quad (10.2)$$

Where  $I_{input}$  and  $I_{output}$  are the total nitrogen input and output to industry system;

$I_{material}$  is raw materials for industrial production;  $I_{production}$  is industrial production;

$I_{water-water}$  is the waste water discharge from industry;  $I_{NO_x}$  is NO<sub>x</sub> emission during industrial production.

**Table S27.** Input and output items in processes of industry system.

| Item              | Value (Gg) | Reference |
|-------------------|------------|-----------|
| $I_{waste-water}$ | 0.11       | [62]      |
| $I_{NO_x}$        | 11.7       | [62]      |

## Nearby sea system

- Model of N flow in coastal system

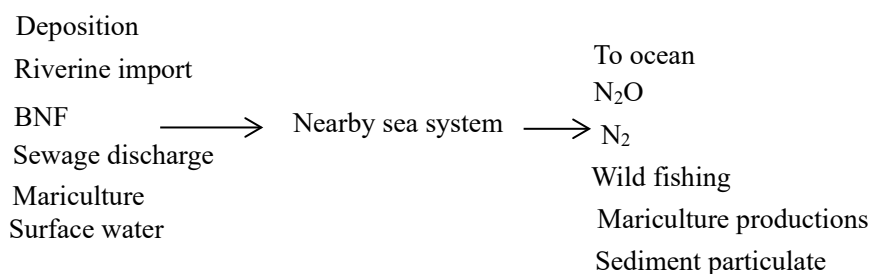

- Equation

According to the coastal system nitrogen flow model the input-output are shown above. This section describes in detail the calculation of each input item, coefficients and activity data. The equation of nearby sea system can be calculated using the following method:

$$O_{input} = O_{deposition} + O_{riverine} + O_{BNF} + O_{sewage-discharge} + O_{mariculture} + O_{surfacewater} \quad (11.1)$$

$$O_{output} = O_{wild-fish} + O_{N_2} + O_{N_2O} + O_{mariculture-productions} + O_{to-ocean} + O_{sediment-particulate} \quad (11.2)$$

Where  $O_{input}$  and  $O_{output}$  are the total nitrogen input and output to nearby sea system;

$O_{deposition}$  is atmospheric deposition to coastal region;  $O_{riverine}$  is riverine import from out of system;  $O_{BNF}$  is the microbial nitrogen fixation in coastal;  $O_{sewage-discharge}$  is the tail water from sewage treatment plants;  $O_{surfacewater}$ : the surface water from inland to near sea;  $O_{mariculture}$  is nitrogen from marine aquaculture in coastal;  $O_{wild-fish}$ : The total



amount of wild fish  $O_{mariculture-productions}$  is the nitrogen of marine catch productions;  
 $O_{N_2}$  is denitrification in nearby sea mainly including  $N_2$ ;  $O_{N_2O}$  is  $N_2O$  emission from  
nearby sea;  $O_{sediment-particulate}$  is particulate nitrogen sediment;  $O_{to-ocean}$  is nitrogen  
transferred to further ocean.

**Table S28.** Input and output items in processes of coastal system.

| Items                     | Equations                                       | Activity data and parameters description                               |
|---------------------------|-------------------------------------------------|------------------------------------------------------------------------|
| Deposition                | $O_{deposition} = F26 \times R4$                | F26: Area of coastal                                                   |
| Riverine import           | $O_{riverine} = F27 \times R89$                 | F27: The inflow of river into the sea<br>R89: The N content of river   |
| BNF                       | $O_{riverine} = F26 \times R90$                 | R90: The rate of microbial nitrogen fixation                           |
| Tail water                | $O_{sewage-discharge} = S_{tail-water}$         | Table10 Sewage system                                                  |
| Mariculture               | $O_{mariculture} = A_{fertilizer-2} + A_{bait}$ | Table16 Aquaculture system                                             |
| Wild fish                 | $O_{wild-fish} = F28 \times R65$                | F28: Wild catches                                                      |
| Mariculture productions   | $O_{mariculture-productions} = F29 \times R65$  | F29: Mariculture productions                                           |
| Denitrification           | $O_{denitrification} = F26 \times R91$          | R91: Rate of denitrification                                           |
| $N_2O$                    | $O_{N_2O} = F26 \times R92$                     | R92: Rate of $N_2O$                                                    |
| Sediment of particulate N | $O_{N_2O} = O_{input} \times R93 \times R94$    | R93: Particle inorganic nitrogen ratio<br>R94: Particle sediment ratio |

**Table S29.** The parameter of coastal system.

| NO.        | Item description                        | Unit                                  | Reference | Value       |
|------------|-----------------------------------------|---------------------------------------|-----------|-------------|
| <b>R88</b> | The N content of river                  | Mg/L                                  | [40]      | 3.22        |
| <b>R89</b> | The rate of microbial nitrogen fixation | Mg N/m <sup>2</sup> .d                | [83]      | 25          |
| <b>R90</b> | Rate of denitrification                 | Umol.m <sup>-2</sup> .h <sup>-1</sup> | [84]      | 239.9-707.7 |

|            |                                   |                                       |      |        |
|------------|-----------------------------------|---------------------------------------|------|--------|
| <b>R91</b> | Rate of N <sub>2</sub> O          | Umol.m <sup>-2</sup> .h <sup>-1</sup> | [85] | 0-4.68 |
| <b>R92</b> | Particle inorganic nitrogen ratio | %                                     | [86] | 4.24   |
| <b>R93</b> | Particle inorganic nitrogen ratio | %                                     | [86] | 57     |

**Table S30.** The activity data of coastal system.

| <b>No.</b> | Item description                 | Unit           | Reference    |
|------------|----------------------------------|----------------|--------------|
| <b>F26</b> | Area of coastal                  | ha             | [75]         |
| <b>F27</b> | The inflow of river into the sea | M <sup>3</sup> | Field survey |
| <b>F28</b> | marine catches                   | T              | [75]         |

### Reference

63. Ti, C.; Pan, J.; Xia, Y.; Yan, X. A nitrogen budget of mainland China with spatial and temporal variation. *Biogeochemistry* **2012**, *108*, 381–394.
64. Yan, W.; Yin, C.; Zhang, S. Nutrient budgets and biogeochemistry in an experimental agricultural watershed in Southeastern China. *Biogeochemistry*. **1999**, *45*, 1–19.
65. Chen, N.W.; Hong, H.S.; Huang, Q.J.; Wu, J.Z. Atmospheric nitrogen deposition and its long-term dynamics in a southeast China coastal area. *J. Environ. Manag.* **2011**, *92*, 1663–1667.
66. Zhou, T.; Wang, Y.; Wang, F.; Feng, Y. Analysis of the nitrogen footprint of agriculture in Guangdong. *China Environ. Sci.* **2014**, *34*, 2430–2438.
67. Wang, M.; Ma, L.; Strokal, M.; Ma, W.Q.; Liu, X.J.; Kroeze C. Hotspots for nitrogen and phosphorus losses from food production in China: A county-scale analysis. *Environ. Sci. Technol.* **2018**, *52*, 5782–5791.
68. Cui, S.; Shi, Y.; Groffman, P.M.; Schlesinger, W. H.; Zhu, Y.G. Centennial-scale analysis of the creation and fate of reactive nitrogen in China (1910–2010). *Proc. Natl. Acad. Sci. USA* **2013**, *110*, 2052–2057.
69. Ma, L.; Velthof, G.L.; Wang, F.H.; Qin, W.; Zhang, W.F.; Zhang, F.S.; Oenema, C. Nitrogen and phosphorus use efficiencies and losses in the food chain in China at regional scales in 1980 and 2005. *Sci. Total Environ.* **2012**, *434*, 51–61.
70. Zheng, X.; Han, S.; Huang, Y.; Wang, Y.; Wang, M. Re-quantifying the emission factors based on field measurements and estimating the direct N<sub>2</sub>O emission from Chinese croplands. *Glob. Biogeochem. Cycles* **2004**, *18*, GB2018.
71. Möller, D.; Schieferdecker, H. Ammonia emission and deposition of NH<sub>x</sub> in the GDR. *Atmos. Environ.* **1989**, *23*, 1187–1193.
72. Cai, B.F. *City's Greenhouse Gas (GHG) Emission Inventory Research*; Chemical Industry Press: Beijing, China, 2009. (In Chinese).
73. Ma, L.; Ma, W.Q.; Velthof, G.L.; Wang, F.H.; Qin, W.; Zhang, F.S.; Oenema, O. Modeling nutrient flows in the food chain of China. *J. Environ. Qual.* **2010**, *39*, 1279–1289.
74. Min, J.; Shi, W. Nitrogen discharge pathways in vegetable production as non-point sources of pollution and measures to control it. *Sci. Total Environ.* **2018**, *613*, 123–130.
75. NBS. *Xiamen Statistic Yearbook*; Xiamen Bureau of Statistics of China: Xiamen, China, 2015. (In Chinese).
76. Liao, C.; Xia, Y.; Wu, D. Nitrogen flows associated with food production and consumption system of Shanghai. *Environ. Pollut.* **2021**, *279*, 116906.
77. Gu, B.; Ju, X.; Chang, J.; Ge, Y.; Vitousek, P.M. Integrated reactive nitrogen budgets and future trends in China. *Proc. Natl. Acad. Sci. USA* **2015**, *112*, 8792–8797.
78. Huang, X.; Song, Y.; Li, M.; Li, J.; Huo, Q.; Cai, X.; Zhang, H. A high-resolution ammonia emission inventory in China. *Glob. Biogeochem. Cycles*. **2012**, *26*, 1030.
79. Xian, C.; Ouyang, Z.; Lu, F.; Xiao, Y.; Li, Y. Quantitative evaluation of reactive nitrogen emissions with urbanization: A case study in Beijing megacity, China. *Environ. Sci. Pollut. Res.* **2016**, *23*, 17689–17701.
80. Crab, R.; Avnimelech, Y.; Defoirdt, T.; Bossier, P.; Verstraete, W. Nitrogen removal techniques in aquaculture for a sustainable production. *Aquaculture* **2007**, *270*, 1–14.

81. Shu, T.F.; Wen, Y.M.; Tang Y.T. Cycle and budget balance of nitrogen in the cultivated water. *Fish. Sci.* **2002**, *21*, 30–34. (In Chinese).
82. Zhang, R.L. Research advances on fertilizer application to lawn. *Chin. J. Trop. Agric.* **2002**, *22*, 77–81. (In Chinese).
83. Xu, J.R.; Wang, Y.S.; Sun, S. The characteristics of nitrogen fixation, ammonification, nitrification and denitrification in coastal zones. *Acta Ecol. Sin.* **2004**, *24*, 2907–2914(In Chinese).
84. Hu, W.; Huaiyang, Z.; Xiaotong, P.; Qunhui, Y.; Chaomei, Q.; Xijie, Y.; Guangqian, C. Denitrification in Qi'ao Island coastal zone, the Zhujiang Estuary in China. *Acta Oceanol. Sin.* **2009**, *28*, 37–46. (In Chinese).
85. Yan, W.; Yang, L.; Wang, F.; Wang, J.; Ma, P. Riverine N<sub>2</sub>O concentrations, exports to estuary and emissions to atmosphere from the Changjiang River in response to increasing nitrogen loads. *Glob. Biogeochem. Cycles* **2012**, *26*, 4006.
86. Yu, Y.; Song, J.; Li, X.; Yuan, H.; Li, N. Distribution, sources and budgets of particulate phosphorus and nitrogen in the East China Sea. *Cont. Shelf Res.* **2012**, *43*, 142–155.
